# Supplementary material for: A Single-Round Infectious Virus with a Codon-Deoptimized Genome: A Powerful Tool for Regulating Pathogenicity of Wild-Type/Live-Attenuated Viruses
Source: Research Square preprint supplement (doi:10.21203/rs.3.rs-6216584/v1), 2025-05-06
Supplement: Supplementary file 1 [file 86249221c1d117db7a5e637e.pdf]

## Supplementary Information

Title: A Single-Round Infectious Virus with a Codon-Deoptimized Genome: A Powerful Tool for Regulation of Pathogenicity of Wild-Type/Live-Attenuated Viruses

Authors:

Takafumi Noguchi, Anju Miyamori, Takeshi Sugimoto, Paola Miyazato, Hirotaka Ebina\*

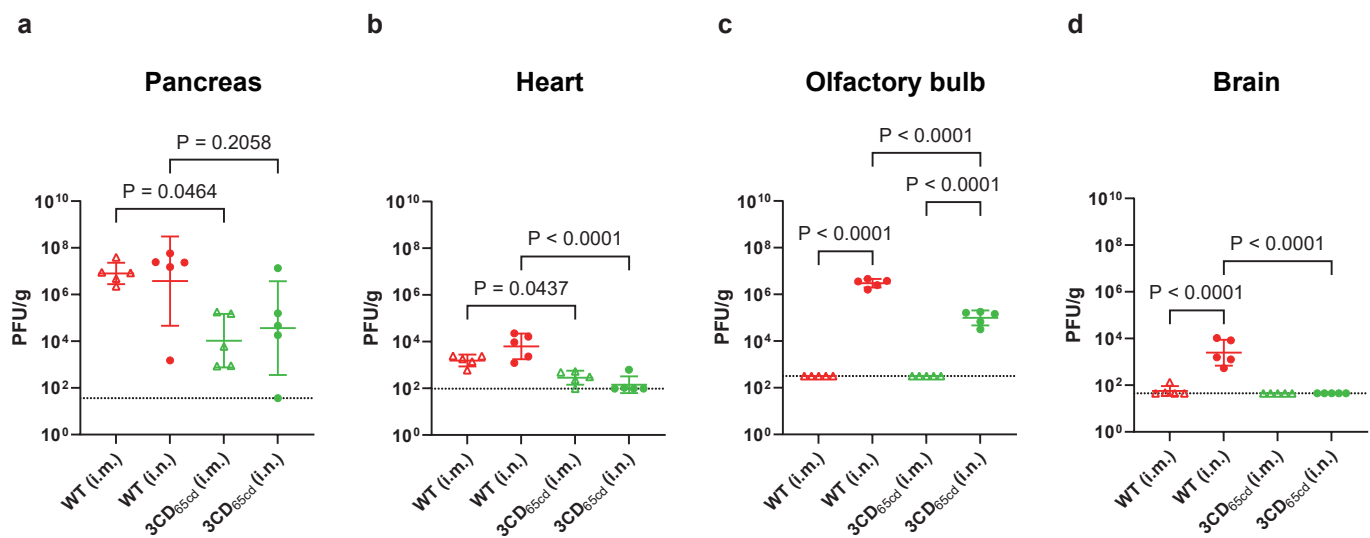

**Figure S1. 3CD<sub>65cd</sub> showed reduced viral replication in multiple tissues**

Mice were infected with WT or 3CD<sub>65cd</sub> (10<sup>3</sup> PFU/mouse) intramuscularly or intranasally. Four days post-infection, viral loads in the (a) pancreas, (b) heart, (c) olfactory bulb, and (d) brain were determined using a plaque assay. The dotted lines represent the assay's limit of detection (LOD). For statistical analysis, two-way ANOVA with Sidak's multiple comparisons test was performed. All data are presented as the mean  $\pm$  SD. The LOD for each organ was set as: heart, 97 PFU/g; pancreas, 36 PFU/g; olfactory bulb,  $3.2 \times 10^2$  PFU/g; and brain, 45 PFU/g.
